# Supplementary material
Source: Springer Nature journal article supplement (https://www.springermedizin.de/resource/supplementary/13099_2013_122_MOESM3_ESM.pdf/9665596)

**A**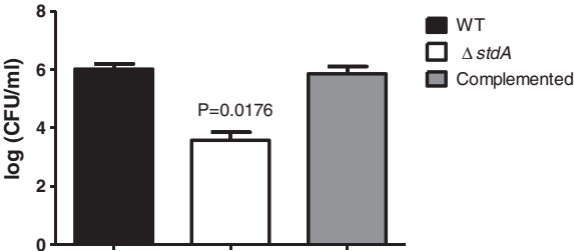**B**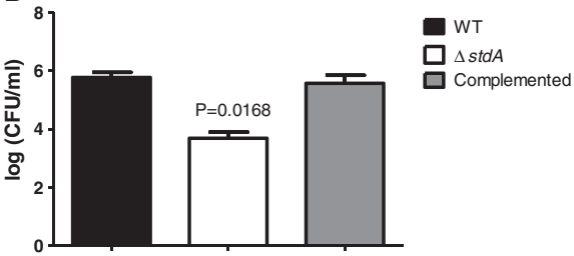

Supplement: MOESM3 [file 9665596]
